# Supplementary material for: CF3-substituted sulfonium cations as efficient chalcogen bond donors towards cyanometalates
Source: Royal Society of Chemistry journal article supplement (doi:10.1039/d3ce01155k), 2024-01-01
Supplement: d3ce01155k1.pdf [file d3ce01155k1.pdf]

## Supporting Information

# CF<sub>3</sub>-Substituted Sulfonium Cations as Efficient Chalcogen Bond Donors towards Cyanometalates

Tim-Niclas Streit, Rosa M. Gomila, Robin Sievers, Antonio Frontera\* and  
Moritz Malischewski\*

## Table of Contents

|                                |    |
|--------------------------------|----|
| Experimental Section .....     | 2  |
| Crystallographic Details ..... | 4  |
| Computational Details .....    | 6  |
| References .....               | 10 |

## Experimental Section

2,8-Difluoro-S-(trifluoromethyl)dibenzothiophenium trifluoromethanesulfonate and potassium tetrakis-(pentafluorophenyl)borate were commercially obtained (Sigma Aldrich, ABCR GmbH) and used without further purification. 5-(Trifluoromethyl)thianthrenium trifluoromethanesulfonate<sup>1</sup> was used from laboratory stock. Potassium pentacarbonylcyanomolybdate(0), tetraethylammonium pentacarbonylcyanomolybdate(0) and 3-nitro-S-(trifluoromethyl)dibenzothiophenium hexafluoroantimonate were synthesized by modified procedures.<sup>2,3</sup> Also an old batch of tetraethylammonium pentacarbonylcyanomolybdate(0) was used which later turned out to be contaminated with 18% of the analogous tungsten compound. All reactions were carried out in previously heated glassware under an atmosphere of argon using standard Schlenk techniques and an oil pump vacuum of 10<sup>-3</sup> mbar. Solvents were dried over activated 3 Å molecular sieves and stored under argon. NMR spectra were measured on a JEOL ECX 400 (400 MHz).

### Infrared (IR) spectroscopy

IR spectroscopy was measured on a FT (Fourier transformation) Nicolet iS10 or iS50 IR-spectrometer. The sample was directly measured by ATR (attenuated total reflection) technique. Characteristic absorptions are given in wavenumbers  $\tilde{\nu}$  [cm<sup>-1</sup>] and intensities are stated as vs (very strong), s (strong), m (medium) and w (weak).

### Mass Spectrometry

Mass spectrometry was performed on an Agilent 6210 ESI TOF (electrospray ionization time-of-flight spectrometer) of Agilent Technologies, Santa Clara, CA in negative mode. Flow rates were set to 10  $\mu$ Lmin<sup>-1</sup>. The evaluation of the resulting data occurred by using Mmass 5.5.0

### Potassium pentacarbonylcyanomolybdate(0):

Molybdenum hexacarbonyl (2.00 g, 7.575 mmol, 1 equiv.) and potassium bis(trimethylsilyl)amide (1.51, 7.575 mmol, 1 equiv.) were suspended in 100 ml of benzene and heated to 80°C for 24 hours. The

reaction mixture was filtered and the residue extensively washed with benzene (300 mL) and diethylether (300 mL). The product was dried in vacuo resulting in an off-white solid (1.85 g). The obtained analytical data was in full agreement with the reported literature.<sup>2</sup>

#### **Tetraethylammonium pentacarbonylcyanomolybdate(0):**

Potassium pentacarbonylcyanomolybdate (1.17 g, 3.885 mmol, 1 equiv.) was dissolved in 5 ml of water. and slowly added to an aqueous solution of tetraethylammoniumbromide (0.98 g 4.663 mmol, 1.2 equiv.). The resulting suspension was filtered and the precipitate washed with water (200 mL). Recrystallization in CH<sub>2</sub>Cl<sub>2</sub>/benzene resulted in a pink solid which was further dried in vacuo (1.52 g).

**IR**(ATR):  $\tilde{\nu}_{\max}$  = 2064 (m), 1994 (s), 1970 (vs), 1860 (vs), 1812 (vs) cm<sup>-1</sup>.

**HRMS** (ESI) calc. for MoC<sub>6</sub>O<sub>5</sub>N [M]<sup>-</sup>: 263.8831; found: [M]<sup>-</sup> 263.8992, [M-CO]<sup>-</sup>: 235.9224, [M-2CO]<sup>-</sup> 207.9088.

**Elemental analysis** for C<sub>14</sub>H<sub>20</sub>MoO<sub>5</sub>N: calculated: C: 42.87%, 5.14%, N: 7.14%; found: C: 42.88, H: 5.22%, N: 7.17%,

#### **2,8-Difluoro-S-(trifluoromethyl)dibenzothiophenium tetrakis(pentafluorophenyl)borate:**

2,8-Difluoro-S-(trifluoromethyl)thianthrenium trifluoromethanesulfonate (44.0 mg, 0.100 mmol, 1.0 equiv.) and KB(C<sub>6</sub>F<sub>5</sub>)<sub>4</sub> (70.0 mg, 0.100 mmol, 1 equiv.) were dissolved in 2 ml of *o*-difluorobenzene and stirred at room temperature for 1 h. The reaction mixture was filtered with a syringe filter and transferred to a fresh Schlenk flask and the solvent was evaporated *in vacuo*. This yielded the desired product as a colorless solid in quantitative yields (95.0 mg).

**<sup>1</sup>H NMR** (400 MHz, Aceton-*d*<sub>6</sub>):  $\delta$  (ppm) = 8.86 (dd, <sup>2</sup>*J*<sub>HH</sub> = 9.0 Hz, <sup>3</sup>*J*<sub>HH</sub> = 4.5 Hz, 2H), 8.51 (dd, <sup>2</sup>*J*<sub>HH</sub> = 8.5 Hz, 2H, <sup>4</sup>*J*<sub>HH</sub> = 2.7), 7.84 (dt, <sup>3</sup>*J*<sub>HH</sub> = 8.8 Hz, <sup>4</sup>*J*<sub>HH</sub> = 2.7 Hz, 2H).

**<sup>13</sup>C{<sup>1</sup>H} NMR** (101 MHz, Aceton-*d*<sub>6</sub>):  $\delta$  (ppm) = 170.0, 167.5, 150.2, 148.0, 145.3 (d, *J* = 9.1 Hz), 140.3, 138.3, 135.9, 133.7 (d, *J* = 10.5 Hz), 126.0, 121.3 (d, *J* = 25 Hz), 120.6, 114.7 (d, *J* = 26.7 Hz).

**<sup>19</sup>F NMR** (377 MHz, Aceton-*d*<sub>6</sub>):  $\delta$  (ppm) = -52.4 (s, 3F), -93.4 (s, 2F), -133.1 (s, 8F), -163.4 (t, <sup>3</sup>*J*<sub>FF</sub> = 21.0 Hz, 4F), -167.39 (t, <sup>3</sup>*J*<sub>FF</sub> = 22.0 Hz, 8F).

#### **2,8-Difluoro-S-(trifluoromethyl)dibenzothiophenium pentacarbonylcyanomolybdate(0):**

2,8-Difluoro-S-(trifluoromethyl)thianthrenium trifluoromethanesulfonate (25.0 mg, 57.0  $\mu$ mol, 1.0 eq.) and KB(C<sub>6</sub>F<sub>5</sub>)<sub>4</sub> (40.0 mg, 57.0  $\mu$ mol, 1.0 equiv.) were dissolved in 2 ml of *o*-difluorobenzene and stirred at room temperature for one hour. The reaction mixture was filtered with a syringe filter and transferred to a fresh Schlenk flask loaded with [NEt<sub>4</sub>][Mo(CO)<sub>5</sub>(CN)] (22.0 mg, 57.0  $\mu$ mol, 1.0 equiv.). The reaction mixture was stirred for 12 h at room temperature. All volatiles were removed and the mixture dissolved in a minimum amount of CH<sub>2</sub>Cl<sub>2</sub>, followed by layering with *n*-pentane and placing it in a -78

°C freezer. After a few days yellow crystals of the desired product could be obtained which were suitable for X-ray diffraction analysis. Removal of [NEt<sub>4</sub>][B(C<sub>6</sub>F<sub>5</sub>)<sub>4</sub>] from the bulk was not possible.

### 5-(Trifluoromethyl)thianthrenium pentacarbonylcyanomolybdate(0):

5-(Trifluoromethyl)thianthrenium trifluoromethanesulfonate (44.0 mg, 0.100 mmol, 1.0 equiv.) and [NEt<sub>4</sub>][Mo(CO)<sub>5</sub>(CN)] (40.0 mg, 0.100 mmol, 1.0 equiv.) were dissolved in 2 ml of CH<sub>2</sub>Cl<sub>2</sub> and stirred at room temperature for 12 h. The reaction mixture was layered with *n*-pentane and placed in a -78 °C freezer. After a few days yellow crystals could be obtained suitable for x-ray diffraction analysis. Removal of [NEt<sub>4</sub>][CF<sub>3</sub>SO<sub>3</sub>] from the bulk was not possible.

### 3-Nitro-S-(Trifluoromethyl)dibenzothiophenium pentacarbonylcyanomolybdate(0):

3-Nitro-S-(trifluoromethyl)dibenzothiophenium hexafluoroantimonate (41.0 mg, 76.0 μmol, 1.0 equiv.) and NEt<sub>4</sub>[Mo<sub>0.822</sub>W<sub>0.178</sub>(CO)<sub>5</sub>(CN)] (30 mg, 0.076 mmol, 1 equiv referring to 100% Mo.) were dissolved in CH<sub>2</sub>Cl<sub>2</sub> and stirred at room temperature for 12 h. The reaction mixture was layered with *n*-pentane and placed in a -78 °C freezer. After a few days red crystals could be obtained suitable for x-ray diffraction analysis. However, removal of [NEt<sub>4</sub>][SbF<sub>6</sub>] from the bulk was not possible.

## Crystallographic Details

X-Ray data were collected on a BRUKER D8 Venture system. Data were collected at 105(2) K using graphite-monochromated Mo K $\alpha$  radiation ( $\lambda = 0.71073$  Å). The strategy for the data collection was evaluated by using the Smart software. The data were collected by the standard “ $\psi$ - $\omega$  scan techniques” and were scaled and reduced using Saint+software. The structures were solved by using Olex2,<sup>4</sup> the structure was solved with the XT<sup>5</sup> structure solution program using Intrinsic Phasing and refined with the XL<sup>6</sup> refinement package using Least Squares minimization. If it is noted, bond length and angles were measured with Diamond Crystal and Molecular Structure Visualization Version 3.1.<sup>7</sup> Drawings were generated with Mercury.<sup>8</sup>

| Identification code | Ritter ·<br>[Mo(CO) <sub>5</sub> (CN)]                                         | UmeF <sub>2</sub> ·<br>[Mo(CO) <sub>5</sub> (CN)]·CH <sub>2</sub> Cl <sub>2</sub> | UmeNO <sub>2</sub> ·<br>[Mo <sub>0.822</sub> W <sub>0.178</sub> (CO) <sub>5</sub> (CN)]<br>·CH <sub>2</sub> Cl <sub>2</sub>          |
|---------------------|--------------------------------------------------------------------------------|-----------------------------------------------------------------------------------|--------------------------------------------------------------------------------------------------------------------------------------|
| CCDC Number         | 2298717                                                                        | 2298718                                                                           | 2298719                                                                                                                              |
| Empirical formula   | C <sub>19</sub> H <sub>8</sub> F <sub>3</sub> MoNO <sub>5</sub> S <sub>2</sub> | C <sub>20</sub> H <sub>8</sub> Cl <sub>2</sub> F <sub>5</sub> MoNO <sub>5</sub> S | C <sub>20</sub> H <sub>9</sub> Cl <sub>2</sub> F <sub>3</sub> Mo <sub>0.822</sub> W <sub>0.178</sub> N <sub>2</sub> O <sub>7</sub> S |
| Formula weight      | 547.32                                                                         | 636.17                                                                            | 645.19                                                                                                                               |
| Temperature/K       | 100.00                                                                         | 100.00                                                                            | 105.00                                                                                                                               |
| Crystal system      | triclinic                                                                      | monoclinic                                                                        | triclinic                                                                                                                            |
| Space group         | P-1                                                                            | C2/c                                                                              | P-1                                                                                                                                  |
| a/Å                 | 9.5818(4)                                                                      | 18.1737(7)                                                                        | 10.1988(4)                                                                                                                           |
| b/Å                 | 10.4568(5)                                                                     | 10.1525(3)                                                                        | 10.2849(4)                                                                                                                           |

|                                               |                                                               |                                                               |                                                               |
|-----------------------------------------------|---------------------------------------------------------------|---------------------------------------------------------------|---------------------------------------------------------------|
| $c/\text{\AA}$                                | 11.5348(5)                                                    | 25.8418(7)                                                    | 13.3894(5)                                                    |
| $\alpha/^\circ$                               | 114.713(2)                                                    | 90                                                            | 73.1800(10)                                                   |
| $\beta/^\circ$                                | 94.029(2)                                                     | 90.060(2)                                                     | 85.274(2)                                                     |
| $\gamma/^\circ$                               | 96.506(2)                                                     | 90                                                            | 62.991(2)                                                     |
| Volume/ $\text{\AA}^3$                        | 1034.22(8)                                                    | 4768.0(3)                                                     | 1195.77(8)                                                    |
| $Z$                                           | 2                                                             | 8                                                             | 2                                                             |
| $\rho_{\text{calc}}/\text{g/cm}^3$            | 1.758                                                         | 1.772                                                         | 1.792                                                         |
| $\mu/\text{mm}^{-1}$                          | 0.894                                                         | 0.933                                                         | 0.927                                                         |
| $F(000)$                                      | 540.0                                                         | 2496.0                                                        | 636.0                                                         |
| Crystal size/ $\text{mm}^3$                   | $0.931 \times 0.495 \times 0.458$                             | $0.714 \times 0.61 \times 0.527$                              | $0.203 \times 0.103 \times 0.087$                             |
| Radiation                                     | MoK $\alpha$ ( $\lambda = 0.71073$ )                          | MoK $\alpha$ ( $\lambda = 0.71073$ )                          | MoK $\alpha$ ( $\lambda = 0.71073$ )                          |
| $2\theta$ range for data collection/ $^\circ$ | 4.342 to 60.948                                               | 4.482 to 56.692                                               | 4.49 to 50.716                                                |
| Index ranges                                  | $-13 \leq h \leq 13, -14 \leq k \leq 14, -16 \leq l \leq 16$  | $-24 \leq h \leq 20, -13 \leq k \leq 13, -34 \leq l \leq 34$  | $-12 \leq h \leq 12, -12 \leq k \leq 12, -16 \leq l \leq 16$  |
| Reflections collected                         | 33264                                                         | 29494                                                         | 17918                                                         |
| Independent reflections                       | 6242 [ $R_{\text{int}} = 0.0341, R_{\text{sigma}} = 0.0228$ ] | 5912 [ $R_{\text{int}} = 0.0439, R_{\text{sigma}} = 0.0339$ ] | 4343 [ $R_{\text{int}} = 0.0334, R_{\text{sigma}} = 0.0276$ ] |
| Data/restraints/parameters                    | 6242/0/280                                                    | 5912/0/316                                                    | 4343/0/325                                                    |
| Goodness-of-fit on $F^2$                      | 1.076                                                         | 1.185                                                         | 1.109                                                         |
| Final R indexes [ $I \geq 2\sigma(I)$ ]       | $R_1 = 0.0216, wR_2 = 0.0541$                                 | $R_1 = 0.0462, wR_2 = 0.0929$                                 | $R_1 = 0.0520, wR_2 = 0.1380$                                 |
| Final R indexes [all data]                    | $R_1 = 0.0243, wR_2 = 0.0558$                                 | $R_1 = 0.0550, wR_2 = 0.0966$                                 | $R_1 = 0.0603, wR_2 = 0.1480$                                 |
| Largest diff. peak/hole / $e \text{\AA}^{-3}$ | 0.48/-0.69                                                    | 1.31/-0.74                                                    | 1.25/-0.99                                                    |

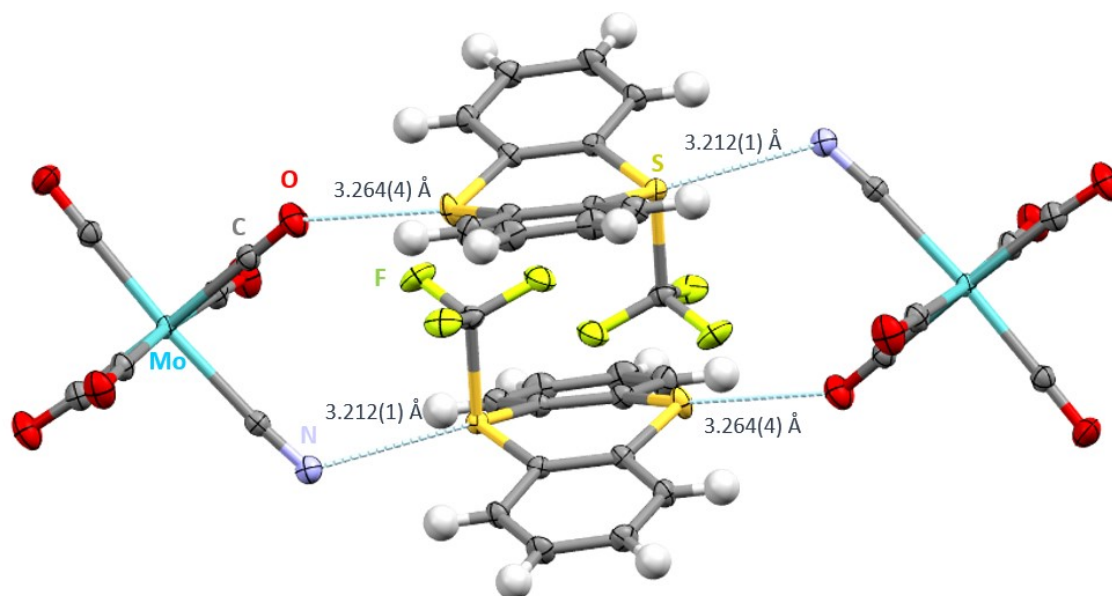

Fig. S1. Interchalcogen bonds in crystals of  $[\text{TT}]^+[\text{Mo}(\text{CO})_5\text{CN}]^-$ . Thermal ellipsoids at the 50% probability level.

## Computational Details

The energy calculations were carried out using the Turbomole 7.7 program<sup>9</sup> and the PBE0<sup>10</sup>-D3<sup>11</sup>/def2-TZVP<sup>12</sup> level of theory. For Mo, the def2-TZVP basis set used in this work includes effective core potentials (ECP),<sup>13</sup> and relativistic effects are used for the inner electrons.<sup>12</sup> The crystallographic coordinates have been used to evaluate the interactions in the solid state of the compounds, since we are interested to study the interactions as they stand in the solid state. The tetramers extracted from the solid-state structures were selected to study the chalcogen bonding interactions. The interaction energies were computed by subtracting the sum of the energies of the monomers to that of the assembly. The Bader's "Atoms in molecules" theory (QTAIM)<sup>14</sup> and noncovalent interaction plot (NCIPlot)<sup>15</sup> were used to study the interactions discussed herein using the Multiwfn program<sup>16</sup> and represented using the VMD visualization software.<sup>17</sup> The molecular electrostatic potential (MEP) surfaces were computed using the 0.001 a.u. isosurface as best estimation of the van der Waals surface at the same level of theory and represented using the GaussView program.<sup>18</sup> For the NCIplot representations, the following settings were used: RDG isosurface = 0.45, density cut-off = 0.04 a. u., color scale  $-0.04 \leq (\text{sign}\lambda_2)\rho \leq 0.04$  a.u. Natural bond orbital (NBO)<sup>19</sup> calculations were performed using the NBO7.0 program.<sup>20</sup> The potential energy density (V) and the bond CP was used as energy predictor to estimate the HB and CH contributions. We have used the equation proposed by Espinosa et al. ( $E = 0.5 * V$ ).<sup>21</sup>

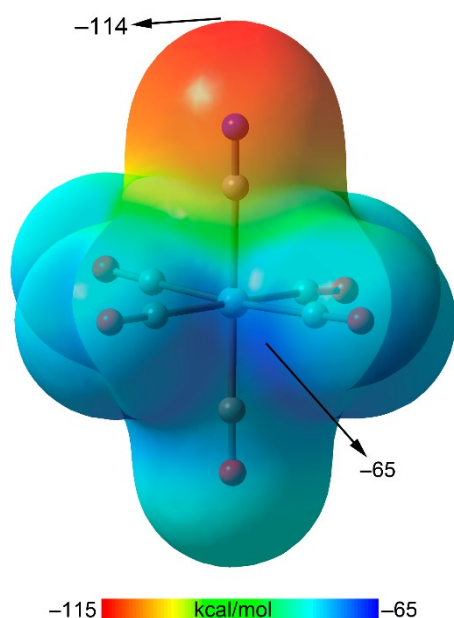

**Fig. S2** MEP surface of [Mo(CO)<sub>5</sub>CN]<sup>-</sup>. Isovalue 0.001 a.u. Energies in kcal/mol

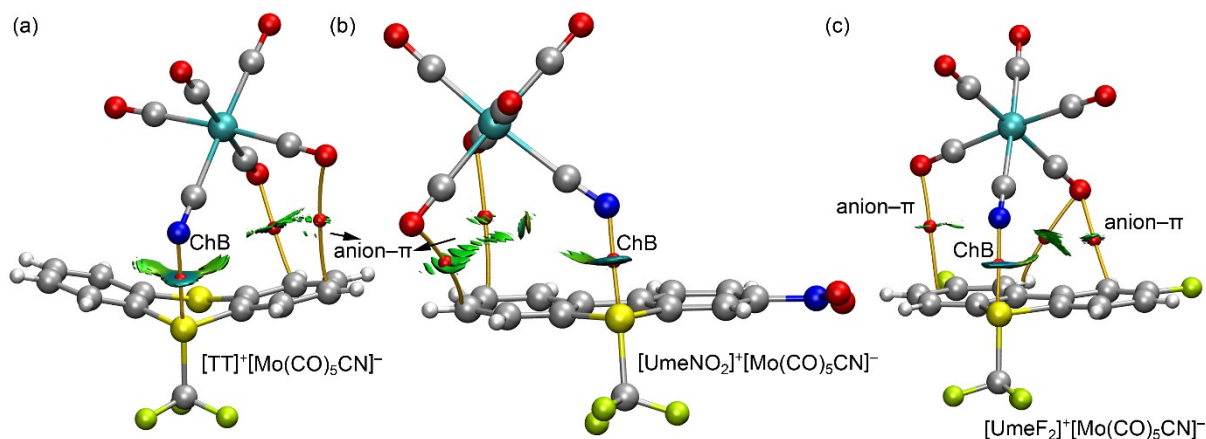

**Fig. S3** QTAIM/NCIplot detailed analyses for the anion- $\pi$  interactions in  $[\text{TT}]^+[\text{Mo}(\text{CO})_5\text{CN}]^-$  (a),  $[\text{UmeNO}_2]^+[\text{Mo}(\text{CO})_5\text{CN}]^-$  (b) and  $[\text{UmeF}_2]^+[\text{Mo}(\text{CO})_5\text{CN}]^-$  (c). Only intermolecular contacts are represented for clarity. NCIplot settings:  $\text{RDG} = 0.5$ ,  $\rho$  cut-off =  $0.04$  a.u.; colour range  $-0.035 \leq \text{sign}\lambda_2\rho \leq 0.035$  a.u.

### Cartesian coordinates

Tetrameric assembly of  $[\text{TT}]^+[\text{Mo}(\text{CO})_5\text{CN}]^-$

|    |              |              |              |
|----|--------------|--------------|--------------|
| Mo | 1.327399994  | 2.287599990  | 9.622499958  |
| O  | 1.205699995  | 5.406899976  | 10.267399955 |
| O  | 4.415099981  | 2.712799988  | 8.949499961  |
| O  | 1.749699992  | -0.829699996 | 9.100999960  |
| O  | -1.813099992 | 1.896399992  | 10.018299956 |
| O  | 1.820499992  | 1.857899992  | 12.711299944 |
| N  | 0.581699997  | 2.471099989  | 6.367599972  |
| C  | 0.854799996  | 2.458299989  | 7.494599967  |
| C  | 1.214799995  | 4.289299981  | 9.988199956  |
| C  | 3.308099986  | 2.563699989  | 9.207899960  |
| C  | 1.575399993  | 0.284199999  | 9.293999959  |
| C  | -0.688999997 | 2.030899991  | 9.888599957  |
| C  | 1.663199993  | 2.015699991  | 11.573899949 |
| S  | -0.109500000 | 4.760399979  | 4.969599978  |
| S  | 1.220499995  | 7.133899969  | 7.022699969  |
| F  | -1.962599991 | 6.253599973  | 3.899799983  |
| F  | -0.285099999 | 5.829199975  | 2.611999989  |
| F  | -0.113400000 | 7.327399968  | 4.150999982  |
| C  | -0.851799996 | 5.304899977  | 6.481699972  |
| C  | -2.046799991 | 4.651899980  | 6.800299970  |
| H  | -2.377799990 | 3.948799983  | 6.253799973  |
| C  | -2.734999988 | 5.053899978  | 7.934599965  |
| H  | -3.556499984 | 4.637299980  | 8.168999964  |
| C  | -2.214199990 | 6.072499973  | 8.726299962  |
| H  | -2.698399988 | 6.362099972  | 9.490599959  |
| C  | -1.008999996 | 6.669799971  | 8.422299963  |
| H  | -0.661099997 | 7.344899968  | 8.993499961  |
| C  | -0.296299999 | 6.292099972  | 7.284899968  |
| C  | 2.133699991  | 6.083599973  | 5.951399974  |
| C  | 3.520399985  | 6.270499973  | 5.953499974  |
| H  | 3.908999983  | 6.941599970  | 6.502399972  |
| C  | 4.329099981  | 5.474799976  | 5.153399977  |
| H  | 5.268399977  | 5.617999975  | 5.150099977  |
| C  | 3.787799983  | 4.472699980  | 4.357499981  |
| H  | 4.355799981  | 3.924999983  | 3.827999983  |
| C  | 2.429799989  | 4.277199981  | 4.340899981  |
| H  | 2.050699991  | 3.585999984  | 3.809999983  |
| C  | 1.608999993  | 5.104799978  | 5.110899978  |
| C  | -0.647599997 | 6.155599973  | 3.837599983  |
| S  | -1.888699992 | 0.673999997  | 5.407799976  |
| S  | -3.218699986 | -1.699499993 | 3.354699985  |
| F  | -0.035600000 | -0.819199996 | 6.477599972  |
| F  | -1.713099993 | -0.394799998 | 7.765399966  |
| F  | -1.884799992 | -1.892999992 | 6.226399973  |
| C  | -1.146399995 | 0.129499999  | 3.895699983  |

|    |              |              |              |
|----|--------------|--------------|--------------|
| C  | 0.048600000  | 0.782499997  | 3.577099984  |
| H  | 0.379599998  | 1.485599994  | 4.123599982  |
| C  | 0.736799997  | 0.380499998  | 2.442799989  |
| H  | 1.558299993  | 0.797099997  | 2.208399990  |
| C  | 0.215999999  | -0.638099997 | 1.650999993  |
| H  | 0.700199997  | -0.927699996 | 0.886799996  |
| C  | -0.989199996 | -1.235399995 | 1.955099991  |
| H  | -1.337099994 | -1.910499992 | 1.383899994  |
| C  | -1.701899993 | -0.857699996 | 3.092499986  |
| C  | -4.131899982 | -0.649199997 | 4.425999981  |
| C  | -5.518699976 | -0.836099996 | 4.423899981  |
| H  | -5.907199974 | -1.507199993 | 3.874999983  |
| C  | -6.327299972 | -0.040400000 | 5.223999977  |
| H  | -7.266599968 | -0.183599999 | 5.227299977  |
| C  | -5.785999975 | 0.961699996  | 6.019899974  |
| H  | -6.353999972 | 1.509399993  | 6.549399971  |
| C  | -4.427999981 | 1.157199995  | 6.036499974  |
| H  | -4.048999982 | 1.848399992  | 6.567399971  |
| C  | -3.607199984 | 0.329599999  | 5.266499977  |
| C  | -1.350599994 | -0.721199997 | 6.539799971  |
| Mo | -3.325599985 | 3.146799986  | 0.754899997  |
| O  | -3.203899986 | 0.027500000  | 0.110000000  |
| O  | -6.413299972 | 2.721599988  | 1.427899994  |
| O  | -3.747899984 | 6.264099973  | 1.276399994  |
| O  | -0.185099999 | 3.537999985  | 0.359099998  |
| O  | -3.818699983 | 3.576499984  | -2.333899990 |
| N  | -2.579899989 | 2.963299987  | 4.009799982  |
| C  | -2.852999988 | 2.976099987  | 2.882799987  |
| C  | -3.212999986 | 1.145099995  | 0.389199998  |
| C  | -5.306299977 | 2.870699987  | 1.169499995  |
| C  | -3.573599984 | 5.150199977  | 1.083399995  |
| C  | -1.309199994 | 3.403499985  | 0.488799998  |
| C  | -3.661399984 | 3.418699985  | -1.196499995 |

Tetrameric assembly of [UmeNO<sub>2</sub>]+[Mo(CO)<sub>5</sub>CN]-

|    |              |              |              |
|----|--------------|--------------|--------------|
| Mo | 6.614199971  | 9.387899959  | 2.283299990  |
| O  | 6.005299974  | 11.359799950 | 4.707399979  |
| O  | 5.714099975  | 11.623999949 | 0.249499999  |
| O  | 9.647499958  | 10.407099955 | 2.271199990  |
| O  | 3.602199984  | 8.423199963  | 2.521999989  |
| O  | 7.218099968  | 7.493699967  | -0.207299999 |
| N  | 7.269099968  | 6.985299969  | 4.509099980  |
| C  | 7.085499969  | 7.799799966  | 3.706799984  |
| C  | 4.699999979  | 8.736699962  | 2.401699990  |
| C  | 8.550799963  | 10.040699956 | 2.274999990  |
| C  | 6.232599973  | 10.646299953 | 3.832199983  |
| C  | 7.007199969  | 8.139899964  | 0.703699997  |
| C  | 6.068599973  | 10.821599953 | 0.996799996  |
| S  | 9.585699958  | 5.927999974  | 5.470299976  |
| F  | 11.067899952 | 4.356899981  | 7.028499969  |
| F  | 12.093899947 | 5.004399978  | 5.271699977  |
| F  | 11.713399949 | 6.396799972  | 6.864699970  |
| O  | 6.826499970  | 1.761299992  | 7.524999967  |
| O  | 6.966399970  | 0.199099999  | 6.026599974  |
| C  | 8.260899964  | 3.503599985  | 6.015099974  |
| H  | 8.163499964  | 3.733399984  | 6.910799970  |
| N  | 7.161799969  | 1.343199994  | 6.409199972  |
| C  | 10.083199956 | 6.158199973  | 3.773399984  |
| C  | 9.695999958  | 5.070199978  | 2.982599987  |
| C  | 8.872599961  | 4.327099981  | 5.097699978  |
| C  | 10.681099953 | 7.290699968  | 3.280699986  |
| H  | 10.913299952 | 8.001099965  | 3.834399983  |
| C  | 11.242799951 | 5.359399977  | 6.201899973  |
| C  | 7.798499966  | 2.300299990  | 5.494299976  |
| C  | 8.531699963  | 2.816799988  | 3.273099986  |
| H  | 8.596499962  | 2.600199989  | 2.371399990  |
| C  | 9.031399961  | 4.021499982  | 3.733699984  |
| C  | 7.931399965  | 1.931799992  | 4.162299982  |
| H  | 7.624099967  | 1.104999995  | 3.867999983  |
| C  | 9.948099957  | 5.141399978  | 1.616099993  |
| H  | 9.704399958  | 4.437999981  | 1.058299995  |
| C  | 10.563499954 | 6.266199973  | 1.091399995  |
| H  | 10.735299953 | 6.311899972  | 0.178799999  |
| C  | 10.924399952 | 7.321899968  | 1.909099992  |
| H  | 11.336599950 | 8.067399965  | 1.535599993  |
| S  | 6.386999972  | 7.021599969  | 7.325099968  |
| F  | 4.904699979  | 8.592699962  | 5.766899975  |



|   |             |              |              |
|---|-------------|--------------|--------------|
| F | 3.878799983 | 7.945199965  | 7.523699967  |
| F | 4.259299981 | 6.552799971  | 5.930699974  |
| O | 9.146099960 | 11.188299951 | 5.270399977  |
| O | 9.006199961 | 12.750499944 | 6.768799970  |
| C | 7.711699966 | 9.445999959  | 6.780299970  |
| H | 7.809199966 | 9.216199960  | 5.884599974  |
| N | 8.810899961 | 11.606399949 | 6.386199972  |
| C | 5.889399974 | 6.791399970  | 9.021999961  |
| C | 6.276599973 | 7.879399966  | 9.812799957  |
| C | 7.100099969 | 8.622499962  | 7.697699966  |
| C | 5.291499977 | 5.658899975  | 9.514699958  |
| H | 5.059299978 | 4.948499978  | 8.960999961  |
| C | 4.729899979 | 7.590199967  | 6.593499971  |
| C | 8.174099964 | 10.649299953 | 7.301099968  |
| C | 7.440899967 | 10.132799956 | 9.522299958  |
| H | 7.376199968 | 10.349399955 | 10.423999954 |
| C | 6.941299970 | 8.928099961  | 9.061699960  |
| C | 8.041299965 | 11.017799952 | 8.633099962  |
| H | 8.348599964 | 11.844599948 | 8.927399961  |
| C | 6.024499974 | 7.808199966  | 11.179299951 |
| H | 6.268299973 | 8.511599963  | 11.737099949 |

Tetrameric assembly of [UmeF2]+[Mo(CO)5CN]-

|    |              |              |              |
|----|--------------|--------------|--------------|
| Mo | 10.787299953 | 1.453599994  | 11.022799952 |
| O  | 12.648399945 | -0.029400000 | 8.932699961  |
| N  | 9.583399958  | 3.281299986  | 8.500699963  |
| O  | 8.677699962  | -0.889399996 | 10.599499954 |
| O  | 13.305099942 | 3.390899985  | 11.307099951 |
| O  | 11.861499948 | -0.407099998 | 13.329499942 |
| O  | 8.924199961  | 3.140199986  | 12.998699943 |
| C  | 9.981199956  | 2.668099988  | 9.387299959  |
| C  | 9.384499959  | -0.007100000 | 10.747599953 |
| C  | 12.371799946 | 2.758399988  | 11.240699951 |
| C  | 11.485399950 | 0.289299999  | 12.500699945 |
| C  | 11.964499948 | 0.485299998  | 9.687599958  |
| C  | 9.580999958  | 2.528999989  | 12.304299946 |
| S  | 7.283399968  | 3.841099983  | 7.162799969  |
| F  | 4.645999980  | 3.504599985  | 6.869499970  |
| F  | 6.294699972  | -1.677999993 | 8.658299962  |
| F  | 5.399199976  | 5.475199976  | 6.417299972  |
| F  | 5.725999975  | 3.849799983  | 5.048699978  |
| F  | 5.819899975  | 4.754399979  | 12.683699945 |
| C  | 7.307799968  | 1.088299995  | 6.587299971  |
| H  | 7.650799967  | 1.270699994  | 5.720299975  |
| C  | 7.030099969  | 2.105599991  | 7.479099967  |
| C  | 7.064999969  | -0.211199999 | 7.009599969  |
| H  | 7.250899968  | -0.949999996 | 6.442199972  |
| C  | 6.535199971  | 1.897499992  | 8.769699962  |
| C  | 6.281599973  | 0.596999997  | 9.177999960  |
| H  | 5.939899974  | 0.406899998  | 10.043599956 |
| C  | 6.421899972  | 3.140199986  | 9.537699958  |
| C  | 6.812599970  | 5.551399976  | 9.319599959  |
| H  | 7.064799969  | 6.292999972  | 8.782899962  |
| C  | 6.769699970  | 4.265099981  | 8.808899961  |
| C  | 6.545999971  | -0.404099998 | 8.275299964  |
| C  | 5.634099975  | 4.182799982  | 6.317799972  |
| C  | 6.123499973  | 4.584899980  | 11.381499950 |
| C  | 6.073199973  | 3.300599986  | 10.874199952 |
| H  | 5.812199975  | 2.562299989  | 11.412499950 |
| C  | 6.465999972  | 5.700599975  | 10.651999953 |
| H  | 6.466699972  | 6.560199971  | 11.056599952 |
| S  | 10.876699952 | 3.841099983  | 5.758099975  |
| F  | 13.514199941 | 3.504599985  | 6.051399974  |
| F  | 11.865499948 | -1.677999993 | 4.262599981  |
| F  | 12.760899944 | 5.475199976  | 6.503599972  |
| F  | 12.434199946 | 3.849799983  | 7.872199966  |
| F  | 12.340199946 | 4.754399979  | 0.237199999  |
| C  | 10.852299953 | 1.088299995  | 6.333599972  |
| H  | 10.509299954 | 1.270699994  | 7.200599969  |
| C  | 11.130099951 | 2.105599991  | 5.441799976  |
| C  | 11.095199952 | -0.211199999 | 5.911299974  |
| H  | 10.909299952 | -0.949999996 | 6.478699972  |
| C  | 11.624999949 | 1.897499992  | 4.151199982  |
| C  | 11.878599948 | 0.596999997  | 3.742899984  |
| H  | 12.220299947 | 0.406899998  | 2.877299987  |
| C  | 11.738299949 | 3.140199986  | 3.383199985  |
| C  | 11.347499950 | 5.551399976  | 3.601299984  |
| H  | 11.095399952 | 6.292999972  | 4.137999982  |

|    |              |              |              |
|----|--------------|--------------|--------------|
| C  | 11.390399950 | 4.265099981  | 4.111899982  |
| C  | 11.614099949 | -0.404099998 | 4.645599980  |
| C  | 12.525999945 | 4.182799982  | 6.603099971  |
| C  | 12.036599947 | 4.584899980  | 1.539399993  |
| C  | 12.086999947 | 3.300599986  | 2.046699991  |
| H  | 12.347999946 | 2.562299989  | 1.508399993  |
| C  | 11.694199949 | 5.700599975  | 2.268899990  |
| H  | 11.693499949 | 6.560199971  | 1.864299992  |
| Mo | 7.372899968  | 1.453599994  | 1.898099992  |
| O  | 5.511699976  | -0.029400000 | 3.988199983  |
| N  | 8.576799963  | 3.281299986  | 4.420199981  |
| O  | 9.482399959  | -0.889399996 | 2.321399990  |
| O  | 4.854999979  | 3.390899985  | 1.613799993  |
| O  | 6.298699972  | -0.407099998 | -0.408599998 |
| O  | 9.235999960  | 3.140199986  | -0.077800000 |
| C  | 8.178999964  | 2.668099988  | 3.533599985  |
| C  | 8.775599962  | -0.007100000 | 2.173299991  |
| C  | 5.788399975  | 2.758399988  | 1.680199993  |
| C  | 6.674799971  | 0.289299999  | 0.420199998  |
| C  | 6.195699973  | 0.485299998  | 3.233299986  |
| C  | 8.579199963  | 2.528999989  | 0.616599997  |

## References

1. H. Jia, A. P. Häring, F. Berger, L. Zhang and T. Ritter, *J. Am. Chem. Soc.*, 2021, **143**, 7623–7628.
2. W. P. Fehlhammer, W. A. Herrmann, K. Öfele, in G. Brauer (Editor.): *Handbuch der Präparativen Anorganischen Chemie, Bd. III, 3. Aufl., Ferdinand Enke Verlag. Stuttgart 1981.*
3. T. Umemoto and S. Ishihara, *J. Am. Chem. Soc.*, 1993, **115**, 2156–2164.
4. O. V. Dolomanov, L. J. Bourhis, R. J. Gildea, J. A. K. Howard and H. Puschmann, *J. Appl. Cryst.*, 2009, **42**, 339–341.
5. G. M. Sheldrick, *Acta Cryst.*, 2015, **C71**, 3–8.
6. G. Sheldrick, *Acta Cryst.*, 2008, **A64**, 112–122.
7. Diamond - Crystal and Molecular Structure Visualization, Crystal Impact - Dr. H. Putz & Dr. K. Brandenburg GbR, Kreuzherrenstr. 102, 53227 Bonn, Germany, <https://www.crystalimpact.de/diamond>.
8. C. F. Macrae, P. R. Edgington, P. McCabe, E. Pidcock, G. P. Shields, R. Taylor, M. Towler and J. van de Streek, *J. Appl. Cryst.*, 2006, **39**, 453–457.
9. R. Ahlrichs, M. Bär, M. Hacer, H. Horn, C. Kömel, *Chem. Phys. Lett.*, 1989, **162**, 165–169.
10. C. Adamo and V. Barone, *J. Chem. Phys.*, 1999, **110**, 6158–6170.
11. S. Grimme, J. Antony, S. Ehrlich and H. Krieg, *J. Chem. Phys.*, 2010, **132**, 154104.
12. F. Weigend, *Phys. Chem. Chem. Phys.* 2006, **8**, 1057–1065.
13. D. Andrae, U. Haeussermann, M. Dolg, H. Stoll and H. Preuss, *Theor. Chim. Acta*, 1990, **77**, 123–141.
14. R. F. W. Bader, *Chem. Rev.*, 1991, **91**, 893–928.
15. E. R. Johnson, S. Keinan, P. Mori-Sánchez, J. Contreras-García, A. J. Cohen and W. Yang, *J. Am. Chem. Soc.*, 2010, **132**, 6498–6506.
16. T. Lu and F. Chen, *J. Comput. Chem.*, 2012, **33**, 580–592.
17. J. W. Humphrey, A. Dalke and K. Schulten, *J. Mol. Graphics*, 1996, **14**, 33–38.
18. T. A. Keith and J. Millam, GaussView, Version 6.0.16, R. Dennington, Semichem Inc., Shawnee Mission, KS, 2019.
19. E. D. Glendening, C. R. Landis and F. Weinhold, *WIREs Comput. Mol. Sci.*, 2012, **2**, 1–42.
20. E. D. Glendening, J. K. Badenhoop, A. E. Reed, J. E. Carpenter, J. A. Bohmann, C. M. Morales, P. Karafiloglou, C. R. Landis and F. Weinhold, NBO 7.0; Theoretical Chemistry Institute, University of Wisconsin: Madison, WI, USA, 2018.
21. E. Espinosa, E. Molins, and C. Lecomte, *Chem. Phys. Lett.*, 1998, **285**, 170–173.
